# Supplementary material for: Functional Analysis of a Novel ABL (Abnormal Browning Related to Light) Gene in Mycelial Brown Film Formation of Lentinula edodes
Source: MDPI journal article supplement (doi:10.3390/jof6040272), 2020-11-09
Supplement: s1 [file s1]

|              |                                                                               |
|--------------|-------------------------------------------------------------------------------|
| <i>abl-D</i> | MTLVLSRSGSLSS <b>LS</b> SSLSTIATPTTTRTSPPPPHSSLPTGCTSSASASASNHTPRPLQEE        |
| <i>ABL</i>   | MTLVLSRSGSLSSISSLSTIATPTTTRTSPPPPHSSLPPGCTSSASASASNHTPRPLQEE                  |
| <i>abl-D</i> | KTEPYYADDSYKDPPPPAH <b>VL</b> <b>TG</b> EFGVKIRDFAYEKGGVEVRRVKKYVRPEGQGIGRRRE |
| <i>ABL</i>   | KTEPYYADDSYKDPPPPAHVLASEFGVKIRDFAYEKGGVEVRRVKKYVRPEGQGIGRRRE                  |
| <i>abl-D</i> | PVLVQRQPTPPGQRGWMWGVGVGGGGGCENAEASTSSGLTRQRVVQDIEDLEFHSQSQ                    |
| <i>ABL</i>   | PVLVQRQPTPPGQRGWMWGVGVGGGGVGGGYENAEASTSSGLTRQRVVQDIEDLEFHSQSQ                 |
| <i>abl-D</i> | SQSQSQSQSQPQSLPPFEHI <b>SFSE</b> SDGEPYIETPAVTPNGSLQWKTTTAAEEELTLPSLHN        |
| <i>ABL</i>   | SQSQSQSQSQPQSLPPFEHITFSDSDGEPYIETPAVTPNGSLQWKTTTAAEEELTLPSLHN                 |
| <i>abl-D</i> | LPSSKRAFHPDD <b>DEDE</b> EQHHTTPPQPPTKKQRVVSPiKRYNLRERRPPATT <b>TTTT</b> LLPP |
| <i>ABL</i>   | LPSSKRAFHPDD-----EQHHTTPPQPPTKKQRVVSPiKRYNLRERRPPTTT----LLPP                  |
| <i>abl-D</i> | SRLRNILSVQSSQSQLSTGPKGRRKGKARTTRV                                             |
| <i>ABL</i>   | SRLRNILSVESSQSQLSTGPKGRRKGKARTTRV                                             |

**Supplementary Figure S1. Amino acid sequence alignment of *abl-D* and *ABL*.** Amino acid residues were expressed in one-letter codes and gaps in the aligned sequences were introduced to maximize similarities. Sites where mutation has been identified in *abl-D* are highlighted by colors. Blue, synonymous mutation; Red, missense mutation; yellow, insertion.
