# Supplementary material for: Functional Analysis of a Novel ABL (Abnormal Browning Related to Light) Gene in Mycelial Brown Film Formation of Lentinula edodes
Source: J Fungi (Basel). 2020 Nov 9;6(4):272. doi: 10.3390/jof6040272 (PMC7712820; doi:10.3390/jof6040272)
Supplement: Supplementary file 1 [file jof-06-00272-s001.tgz › suppplementary materials/Table S1.xlsx]

## Sheet: Table S1
No.	Sample_ID	No. of raw reads	No. of clean reads1	% Clean reads2	Total base of clean reads	% Deduplicated reads3	No. of mapped reads	%Mapped reads4	%Uniquely mapped reads5	Avg. read depth (x)
1	Chamaram	25678234	12993314	50.6	1284990009	98.96	11634609	90.48	72.78	25.06
2	2x196 (Sanjo713)	25908698	24408604	94.21	2455056306	99.15	22525855	93.08	76.29	48.95
3	P37-5	26321634	24882476	94.53	2503066236	98.8	23268814	94.65	79.57	50.62
4	N32	23070434	21677568	93.96	2180466854	99.16	19978316	92.94	76.1	43.42
5	N27	22251536	20905522	93.95	2102794164	99.28	19274840	92.87	75.23	41.88
6	Sanmaru1	24204578	22703498	93.8	2279411461	99.07	19950954	88.7	69.62	43.13
7	Sanmaru2	24727506	23086234	93.36	2316320966	99.11	20299222	88.72	69.29	43.85
8	Sanbaekhyang	21320364	20114394	94.34	2022915668	99.12	17634381	88.45	68.98	38.19
9	Songgo	23960592	22656114	94.56	2278109868	98.04	19965283	89.88	74.44	43.26
10	Hyanggo808	23007440	21595084	93.86	2167855820	99.18	19067405	89.02	71.11	41.25
11	Sanjo701	17676134	11349290	64.21	1127436553	99.03	9942490	88.46	69.72	21.38
12	Sanjo702	24259536	22853450	94.2	2294687404	98.97	20252975	89.55	72.68	43.82
13	Sanjo704	24587478	23752344	96.6	2390165990	98.69	21054180	89.82	71.47	45.63
14	Sanjo705	22995170	22184852	96.48	2232240645	98.84	19844861	90.51	70.79	43.02
15	Sanjo706	19830330	19204530	96.84	1932650204	98.87	16968176	89.36	70.3	36.75
16	Sanjo707	25518080	24178152	94.75	2431649621	98.05	21037441	88.74	72.72	45.6
17	Sanjo708	23630860	22788490	96.44	2292595648	98.57	20588580	91.66	76.24	44.67
18	Sanjo709	20112550	19417824	96.55	1953757018	98.95	17183906	89.44	72.42	37.24
19	Sanjo710	23245986	22196156	95.48	2231718131	98.85	20058435	91.42	72.62	43.48
20	Chamsongi	28076224	26437028	94.16	2654247358	98.84	23382370	89.48	73.31	50.62
21	ISSI (GNA01)	25463070	23573300	92.58	2371726882	98.61	20864211	89.76	74.07	45.24
1 Reads that the quality score is ≥ Q30
2 (No. of clean reads/No. of raw reads) x 100 (%)
3 (No. deduplicated reads/No. clean reads) x 100 (%)
4 (No. of mapped reads/No. of deduplicated reads) x 100 (%)
5 (No. of uniquely mapped reads/No. of deduplicated reads) x 100 (%)
