# Supplementary material for: Functional Analysis of a Novel ABL (Abnormal Browning Related to Light) Gene in Mycelial Brown Film Formation of Lentinula edodes
Source: J Fungi (Basel). 2020 Nov 9;6(4):272. doi: 10.3390/jof6040272 (PMC7712820; doi:10.3390/jof6040272)
Supplement: Supplementary file 1 [file jof-06-00272-s001.tgz › suppplementary materials/Table S2.xlsx]

## Sheet: Table S2
Scaffold	Position (bp)	REF	ALT	QUAL	DP	GT: 37-5	GT: Chamaram	GT: 2x196	GT: N32	GT: N27
Scaffold1	3168855	C	T	142.7	201	#1/1	#0/1	#0/0	#0/0	#0/0
Scaffold1	3170408	A	G	18.17	143	#1/1	#0/1	#0/0	#0/0	#0/0
Scaffold1	3173337	G	A	359.36	126	#1/1	#0/1	#0/0	#0/0	#0/0
Scaffold1	3195457	G	A	773.21	137	#1/1	#0/1	#0/0	#0/0	#0/0
Scaffold1	3224215	A	G	451.35	108	#1/1	#0/1	#0/0	#0/0	#0/0
Scaffold1	3239854	C	T	546.91	123	#1/1	#0/1	#0/0	#0/0	#0/0
Scaffold1	3239898	A	G	497.28	121	#1/1	#0/1	#0/0	#0/0	#0/0
Scaffold1	3239902	T	C	539.25	119	#1/1	#0/1	#0/0	#0/0	#0/0
Scaffold1	3239939	T	A	804.9	128	#1/1	#0/1	#0/0	#0/0	#0/0
Scaffold1	3246817	A	T	359.58	108	#1/1	#0/1	#0/0	#0/0	#0/0
Scaffold1	3246819	G	A	359.58	110	#1/1	#0/1	#0/0	#0/0	#0/0
Scaffold1	3246844	C	T	193.13	107	#1/1	#0/1	#0/0	#0/0	#0/0
Scaffold1	3246856	A	G	227.26	112	#1/1	#0/1	#0/0	#0/0	#0/0
Scaffold1	3246858	A	G	227.26	112	#1/1	#0/1	#0/0	#0/0	#0/0
Scaffold1	3246874	G	T	315.08	113	#1/1	#0/1	#0/0	#0/0	#0/0
Scaffold1	3246879	C	T	315.38	113	#1/1	#0/1	#0/0	#0/0	#0/0
Scaffold1	3250087	A	G	699.96	135	#1/1	#0/1	#0/0	#0/0	#0/0
Scaffold1	3291302	T	A	272.58	118	#1/1	#0/1	#0/0	#0/0	#0/0
Scaffold1	3291305	A	C	272.58	116	#1/1	#0/1	#0/0	#0/0	#0/0
Scaffold1	3291311	G	A	228.16	117	#1/1	#0/1	#0/0	#0/0	#0/0
Scaffold1	3291312	A	G	228.16	117	#1/1	#0/1	#0/0	#0/0	#0/0
Scaffold1	4027586	T	C	612.12	99	#1/1	#0/1	#0/0	#0/0	#0/0
Scaffold1	4027587	G	A	567.07	105	#1/1	#0/1	#0/0	#0/0	#0/0
Scaffold1	4329148	T	C	170.62	125	#1/1	#0/1	#0/0	#0/0	#0/0
Scaffold1	4333000	A	G	248.38	101	#1/1	#0/1	#0/0	#0/0	#0/0
Scaffold1	4343154	A	T	303.29	117	#1/1	#0/1	#0/0	#0/0	#0/0
Scaffold1	4343155	C	G	303.29	114	#1/1	#0/1	#0/0	#0/0	#0/0
Scaffold1	4345232	T	C	102.37	115	#1/1	#0/1	#0/0	#0/0	#0/0
Scaffold1	4345236	C	T	102.37	114	#1/1	#0/1	#0/0	#0/0	#0/0
Scaffold1	4345241	C	T	99.81	112	#1/1	#0/1	#0/0	#0/0	#0/0
Scaffold1	4352935	T	C	411.28	103	#1/1	#0/1	#0/0	#0/0	#0/0
Scaffold1	4352938	C	T	377.65	102	#1/1	#0/1	#0/0	#0/0	#0/0
Scaffold1	4364942	G	C	143.67	94	#1/1	#0/1	#0/0	#0/0	#0/0
Scaffold1	4364946	G	A	143.67	92	#1/1	#0/1	#0/0	#0/0	#0/0
Scaffold1	4364950	G	A	144.53	90	#1/1	#0/1	#0/0	#0/0	#0/0
Scaffold1	4364952	A	G	143.67	89	#1/1	#0/1	#0/0	#0/0	#0/0
Scaffold1	4364964	C	T	321.32	96	#1/1	#0/1	#0/0	#0/0	#0/0
Scaffold1	4364965	A	G	321.32	97	#1/1	#0/1	#0/0	#0/0	#0/0
Scaffold1	4375201	G	A	63.07	172	#1/1	#0/1	#0/0	#0/0	#0/0
Scaffold1	4375352	G	A	99.84	143	#1/1	#0/1	#0/0	#0/0	#0/0
Scaffold1	4375354	A	G	106.73	142	#1/1	#0/1	#0/0	#0/0	#0/0
Scaffold1	4375958	T	C	685.92	100	#1/1	#0/1	#0/0	#0/0	#0/0
Scaffold1	4375969	T	C	752.43	99	#1/1	#0/1	#0/0	#0/0	#0/0
Scaffold1	4375981	G	A	753.92	106	#1/1	#0/1	#0/0	#0/0	#0/0
Scaffold1	4460559	G	A	4289.23	127	#0/0	#0/1	#1/1	#1/1	#1/1
Scaffold1	4460588	G	A	2872.17	80	#0/0	#0/1	#1/1	#1/1	#1/1
Scaffold1	4465168	A	C	594.05	83	#1/1	#0/1	#0/0	#0/0	#0/0
Scaffold1	4465174	G	T	368.05	81	#1/1	#0/1	#0/0	#0/0	#0/0
Scaffold1	5150640	G	T	182.06	54	#1/1	#0/1	#0/0	#0/0	#0/0
Scaffold1	5150647	C	T	179.16	52	#1/1	#0/1	#0/0	#0/0	#0/0
Scaffold10	1434345	C	T	17.37	68	#1/1	#0/1	#0/0	#0/0	#0/0
Scaffold11	4499	C	T	196.92	11	#0/0	#0/1	#1/1	#1/1	#1/1
Scaffold11	140506	T	C	227.95	129	#1/1	#0/1	#0/0	#0/0	#0/0
Scaffold11	204183	G	A	334.17	43	#1/1	#0/1	#0/0	#0/0	#0/0
Scaffold11	208379	G	A	154.69	99	#1/1	#0/1	#0/0	#0/0	#0/0
Scaffold11	222096	G	A	323.75	108	#1/1	#0/1	#0/0	#0/0	#0/0
Scaffold11	222111	A	T	187.11	80	#1/1	#0/1	#0/0	#0/0	#0/0
Scaffold11	222115	A	G	145.11	79	#1/1	#0/1	#0/0	#0/0	#0/0
Scaffold11	261712	A	G	73.7	140	#1/1	#0/1	#0/0	#0/0	#0/0
Scaffold11	862513	T	C	119.3	103	#1/1	#0/1	#0/0	#0/0	#0/0
Scaffold12	351707	G	A	479.94	292	#1/1	#0/1	#0/0	#0/0	#0/0
Scaffold12	415703	G	A	131.09	67	#1/1	#0/1	#0/0	#0/0	#0/0
Scaffold12	920952	T	C	56.45	95	#1/1	#0/1	#0/0	#0/0	#0/0
Scaffold12	920961	A	G	101.67	97	#1/1	#0/1	#0/0	#0/0	#0/0
Scaffold12	920967	C	T	104.05	95	#1/1	#0/1	#0/0	#0/0	#0/0
Scaffold12	920976	T	C	156.71	93	#1/1	#0/1	#0/0	#0/0	#0/0
Scaffold12	920984	T	C	243.75	97	#1/1	#0/1	#0/0	#0/0	#0/0
Scaffold12	920994	T	C	288.48	97	#1/1	#0/1	#0/0	#0/0	#0/0
Scaffold12	920997	T	C	379.1	102	#1/1	#0/1	#0/0	#0/0	#0/0
Scaffold12	937992	G	A	437.44	118	#1/1	#0/1	#0/0	#0/0	#0/0
Scaffold12	988362	G	A	282.13	118	#1/1	#0/1	#0/0	#0/0	#0/0
Scaffold12	1011078	G	A	36.26	135	#1/1	#0/1	#0/0	#0/0	#0/0
Scaffold12	1012144	C	A	162.19	103	#1/1	#0/1	#0/0	#0/0	#0/0
Scaffold12	1021362	G	A	331.37	102	#1/1	#0/1	#0/0	#0/0	#0/0
Scaffold12	1021369	A	T	333.57	99	#1/1	#0/1	#0/0	#0/0	#0/0
Scaffold12	1048620	A	G	94.34	127	#1/1	#0/1	#0/0	#0/0	#0/0
Scaffold12	1094277	C	T	272.61	187	#1/1	#0/1	#0/0	#0/0	#0/0
Scaffold13	8447	G	A	100.63	45	#1/1	#0/1	#0/0	#0/0	#0/0
Scaffold13	8454	T	C	141.17	46	#1/1	#0/1	#0/0	#0/0	#0/0
Scaffold13	11560	T	C	90.59	113	#1/1	#0/1	#0/0	#0/0	#0/0
Scaffold13	20593	G	A	91.38	101	#1/1	#0/1	#0/0	#0/0	#0/0
Scaffold13	20594	T	G	91.38	102	#1/1	#0/1	#0/0	#0/0	#0/0
Scaffold13	63736	C	T	60.17	122	#1/1	#0/1	#0/0	#0/0	#0/0
Scaffold13	63739	C	T	60.24	120	#1/1	#0/1	#0/0	#0/0	#0/0
Scaffold13	81541	T	G	253.06	108	#1/1	#0/1	#0/0	#0/0	#0/0
Scaffold14	480515	C	T	544.97	125	#1/1	#0/1	#0/0	#0/0	#0/0
Scaffold14	480525	A	T	803.9	128	#1/1	#0/1	#0/0	#0/0	#0/0
Scaffold14	480644	T	G	623.96	131	#1/1	#0/1	#0/0	#0/0	#0/0
Scaffold14	480645	G	T	623.96	131	#1/1	#0/1	#0/0	#0/0	#0/0
Scaffold14	480648	T	C	581.02	130	#1/1	#0/1	#0/0	#0/0	#0/0
Scaffold14	480650	T	A	542.1	131	#1/1	#0/1	#0/0	#0/0	#0/0
Scaffold14	480654	T	C	499.98	127	#1/1	#0/1	#0/0	#0/0	#0/0
Scaffold14	536931	A	T	38.58	178	#1/1	#0/1	#0/0	#0/0	#0/0
Scaffold14	536949	A	G	196.77	168	#1/1	#0/1	#0/0	#0/0	#0/0
Scaffold14	582084	T	G	533.21	105	#1/1	#0/1	#0/0	#0/0	#0/0
Scaffold14	582095	C	G	545.21	106	#1/1	#0/1	#0/0	#0/0	#0/0
Scaffold14	582336	A	G	254.76	87	#1/1	#0/1	#0/0	#0/0	#0/0
Scaffold14	582340	C	T	299.56	88	#1/1	#0/1	#0/0	#0/0	#0/0
Scaffold14	582341	C	T	299.51	88	#1/1	#0/1	#0/0	#0/0	#0/0
Scaffold14	582355	C	T	303.29	96	#1/1	#0/1	#0/0	#0/0	#0/0
Scaffold14	582366	A	G	382.09	99	#1/1	#0/1	#0/0	#0/0	#0/0
Scaffold14	582385	A	G	446.26	95	#1/1	#0/1	#0/0	#0/0	#0/0
Scaffold14	630294	C	T	266.27	98	#1/1	#0/1	#0/0	#0/0	#0/0
Scaffold14	664043	T	C	395.25	191	#1/1	#0/1	#0/0	#0/0	#0/0
Scaffold14	676916	A	G	60.5	106	#1/1	#0/1	#0/0	#0/0	#0/0
Scaffold14	715336	C	A	1829.59	49	#0/0	#0/1	#1/1	#1/1	#1/1
Scaffold14	715362	C	T	1487.61	38	#0/0	#0/1	#1/1	#1/1	#1/1
Scaffold14	715363	C	G	1487.61	37	#0/0	#0/1	#1/1	#1/1	#1/1
Scaffold14	715588	C	T	897.11	24	#0/0	#0/1	#1/1	#1/1	#1/1
Scaffold14	720700	G	A	124.44	24	#1/1	#0/1	#0/0	#0/0	#0/0
Scaffold14	743268	C	T	273.83	51	#1/1	#0/1	#0/0	#0/0	#0/0
Scaffold14	743291	G	T	162.06	54	#1/1	#0/1	#0/0	#0/0	#0/0
Scaffold14	743293	G	C	162.53	54	#1/1	#0/1	#0/0	#0/0	#0/0
Scaffold14	743302	C	T	120.62	55	#1/1	#0/1	#0/0	#0/0	#0/0
Scaffold14	743303	A	G	121.09	55	#1/1	#0/1	#0/0	#0/0	#0/0
Scaffold14	743508	A	G	107.43	103	#1/1	#0/1	#0/0	#0/0	#0/0
Scaffold14	743513	C	T	110.52	100	#1/1	#0/1	#0/0	#0/0	#0/0
Scaffold14	743515	G	A	106.35	98	#1/1	#0/1	#0/0	#0/0	#0/0
Scaffold14	746022	T	G	347.73	74	#1/1	#0/1	#0/0	#0/0	#0/0
Scaffold14	746026	T	C	344.38	75	#1/1	#0/1	#0/0	#0/0	#0/0
Scaffold14	746027	G	A	344.4	77	#1/1	#0/1	#0/0	#0/0	#0/0
Scaffold14	746029	T	C	341.45	79	#1/1	#0/1	#0/0	#0/0	#0/0
Scaffold14	746050	T	C	200.95	78	#1/1	#0/1	#0/0	#0/0	#0/0
Scaffold14	839966	G	T	145.24	66	#1/1	#0/1	#0/0	#0/0	#0/0
Scaffold14	839968	T	G	144.37	66	#1/1	#0/1	#0/0	#0/0	#0/0
Scaffold14	842057	T	G	31.56	74	#1/1	#0/1	#0/0	#0/0	#0/0
Scaffold14	875939	G	A	72.73	48	#1/1	#0/1	#0/0	#0/0	#0/0
Scaffold14	878491	T	C	80.43	33	#1/1	#0/1	#0/0	#0/0	#0/0
Scaffold14	878524	A	G	72.58	50	#1/1	#0/1	#0/0	#0/0	#0/0
Scaffold14	880094	G	A	229.63	85	#1/1	#0/1	#0/0	#0/0	#0/0
Scaffold14	966794	T	C	397.46	19	#0/0	#0/1	#1/1	#1/1	#1/1
Scaffold14	992201	G	A	338.51	68	#1/1	#0/1	#0/0	#0/0	#0/0
Scaffold14	992204	C	T	367.37	64	#1/1	#0/1	#0/0	#0/0	#0/0
Scaffold14	992206	C	T	370.41	65	#1/1	#0/1	#0/0	#0/0	#0/0
Scaffold14	1020856	G	C	141.38	94	#1/1	#0/1	#0/0	#0/0	#0/0
Scaffold14	1088352	C	T	105.68	116	#1/1	#0/1	#0/0	#0/0	#0/0
Scaffold14	1091180	T	C	215.96	57	#1/1	#0/1	#0/0	#0/0	#0/0
Scaffold14	1091184	C	G	257.6	59	#1/1	#0/1	#0/0	#0/0	#0/0
Scaffold14	1091185	T	C	257.56	61	#1/1	#0/1	#0/0	#0/0	#0/0
Scaffold14	1091191	C	T	293.13	71	#1/1	#0/1	#0/0	#0/0	#0/0
Scaffold14	1091197	G	C	293.42	78	#1/1	#0/1	#0/0	#0/0	#0/0
Scaffold14	1091198	G	A	293.36	79	#1/1	#0/1	#0/0	#0/0	#0/0
Scaffold14	1091206	T	C	296.34	75	#1/1	#0/1	#0/0	#0/0	#0/0
Scaffold14	1096608	G	T	101.63	79	#1/1	#0/1	#0/0	#0/0	#0/0
Scaffold14	1098611	T	C	501.04	96	#1/1	#0/1	#0/0	#0/0	#0/0
Scaffold14	1098624	T	C	579.9	99	#1/1	#0/1	#0/0	#0/0	#0/0
Scaffold14	1101632	C	T	125.99	71	#1/1	#0/1	#0/0	#0/0	#0/0
Scaffold14	1108152	A	G	120.81	130	#1/1	#0/1	#0/0	#0/0	#0/0
Scaffold14	1123231	C	T	300.51	77	#1/1	#0/1	#0/0	#0/0	#0/0
Scaffold14	1158042	A	G	81.6	89	#1/1	#0/1	#0/0	#0/0	#0/0
Scaffold15	544584	G	A	491.79	21	#0/0	#0/1	#1/1	#1/1	#1/1
Scaffold15	584999	C	A	803.21	117	#1/1	#0/1	#0/0	#0/0	#0/0
Scaffold15	585001	G	A	848.21	111	#1/1	#0/1	#0/0	#0/0	#0/0
Scaffold15	585011	A	G	854.21	114	#1/1	#0/1	#0/0	#0/0	#0/0
Scaffold15	585020	G	C	856.21	117	#1/1	#0/1	#0/0	#0/0	#0/0
Scaffold15	585028	T	C	721.21	123	#1/1	#0/1	#0/0	#0/0	#0/0
Scaffold16	222146	T	C	279.16	120	#1/1	#0/1	#0/0	#0/0	#0/0
Scaffold16	256497	G	A	202.84	85	#1/1	#0/1	#0/0	#0/0	#0/0
Scaffold16	290134	C	T	2260.34	57	#0/0	#0/1	#1/1	#1/1	#1/1
Scaffold16	297401	C	G	283.92	28	#1/1	#0/1	#0/0	#0/0	#0/0
Scaffold16	311453	G	A	242.33	95	#1/1	#0/1	#0/0	#0/0	#0/0
Scaffold16	311477	C	T	243.29	90	#1/1	#0/1	#0/0	#0/0	#0/0
Scaffold16	342331	T	G	60.52	81	#1/1	#0/1	#0/0	#0/0	#0/0
Scaffold16	342337	G	C	60.74	82	#1/1	#0/1	#0/0	#0/0	#0/0
Scaffold16	349003	A	G	394.62	104	#1/1	#0/1	#0/0	#0/0	#0/0
Scaffold16	488681	T	G	442.3	81	#1/1	#0/1	#0/0	#0/0	#0/0
Scaffold17	312400	A	G	1239.48	160	#1/1	#0/1	#0/0	#0/0	#0/0
Scaffold17	331844	T	C	1250.9	164	#1/1	#0/1	#0/0	#0/0	#0/0
Scaffold17	331910	G	C	317.5	137	#1/1	#0/1	#0/0	#0/0	#0/0
Scaffold17	331913	T	C	275.5	132	#1/1	#0/1	#0/0	#0/0	#0/0
Scaffold17	331915	A	C	278.5	132	#1/1	#0/1	#0/0	#0/0	#0/0
Scaffold17	331925	A	G	233.77	124	#1/1	#0/1	#0/0	#0/0	#0/0
Scaffold17	331926	G	C	233.77	124	#1/1	#0/1	#0/0	#0/0	#0/0
Scaffold17	331930	G	A	189.26	121	#1/1	#0/1	#0/0	#0/0	#0/0
Scaffold17	331931	C	A	145.11	121	#1/1	#0/1	#0/0	#0/0	#0/0
Scaffold17	331950	T	C	235.46	128	#1/1	#0/1	#0/0	#0/0	#0/0
Scaffold17	331955	C	T	415.12	134	#1/1	#0/1	#0/0	#0/0	#0/0
Scaffold17	331956	T	A	415.12	135	#1/1	#0/1	#0/0	#0/0	#0/0
Scaffold17	331958	T	C	417.28	134	#1/1	#0/1	#0/0	#0/0	#0/0
Scaffold17	331970	C	T	802.9	129	#1/1	#0/1	#0/0	#0/0	#0/0
Scaffold17	331976	G	A	892.9	130	#1/1	#0/1	#0/0	#0/0	#0/0
Scaffold17	331979	C	T	935.9	130	#1/1	#0/1	#0/0	#0/0	#0/0
Scaffold17	331982	T	C	935.9	131	#1/1	#0/1	#0/0	#0/0	#0/0
Scaffold17	348942	C	T	459.17	122	#1/1	#0/1	#0/0	#0/0	#0/0
Scaffold17	348943	A	G	459.17	123	#1/1	#0/1	#0/0	#0/0	#0/0
Scaffold17	348954	C	G	459.17	123	#1/1	#0/1	#0/0	#0/0	#0/0
Scaffold17	348961	G	A	461.59	119	#1/1	#0/1	#0/0	#0/0	#0/0
Scaffold17	348969	T	C	461.59	118	#1/1	#0/1	#0/0	#0/0	#0/0
Scaffold17	348981	C	A	439.19	115	#1/1	#0/1	#0/0	#0/0	#0/0
Scaffold17	352660	T	C	991.9	146	#1/1	#0/1	#0/0	#0/0	#0/0
Scaffold17	353888	C	A	497.92	118	#1/1	#0/1	#0/0	#0/0	#0/0
Scaffold17	353895	C	G	497.92	113	#1/1	#0/1	#0/0	#0/0	#0/0
Scaffold17	358188	G	T	338.58	145	#1/1	#0/1	#0/0	#0/0	#0/0
Scaffold17	377295	G	A	320.28	117	#1/1	#0/1	#0/0	#0/0	#0/0
Scaffold17	377300	A	G	320.5	116	#1/1	#0/1	#0/0	#0/0	#0/0
Scaffold17	384620	T	C	81.84	130	#1/1	#0/1	#0/0	#0/0	#0/0
Scaffold17	384632	T	C	103.97	127	#1/1	#0/1	#0/0	#0/0	#0/0
Scaffold17	384638	T	C	103.97	124	#1/1	#0/1	#0/0	#0/0	#0/0
Scaffold19	470580	T	C	113.76	58	#1/1	#0/1	#0/0	#0/0	#0/0
Scaffold19	490676	T	C	207.49	66	#1/1	#0/1	#0/0	#0/0	#0/0
Scaffold19	490677	G	A	207.49	65	#1/1	#0/1	#0/0	#0/0	#0/0
Scaffold19	558499	A	G	367.62	76	#1/1	#0/1	#0/0	#0/0	#0/0
Scaffold2	21603	G	A	153.61	70	#1/1	#0/1	#0/0	#0/0	#0/0
Scaffold2	43016	G	A	142.14	109	#1/1	#0/1	#0/0	#0/0	#0/0
Scaffold2	50305	A	G	154.77	104	#1/1	#0/1	#0/0	#0/0	#0/0
Scaffold2	51031	G	A	134.83	99	#1/1	#0/1	#0/0	#0/0	#0/0
Scaffold2	51032	T	C	131.83	98	#1/1	#0/1	#0/0	#0/0	#0/0
Scaffold2	51037	C	T	131.83	99	#1/1	#0/1	#0/0	#0/0	#0/0
Scaffold2	51052	C	T	69.62	95	#1/1	#0/1	#0/0	#0/0	#0/0
Scaffold2	59375	G	A	314.28	110	#1/1	#0/1	#0/0	#0/0	#0/0
Scaffold2	59378	C	T	356.27	115	#1/1	#0/1	#0/0	#0/0	#0/0
Scaffold2	75154	G	A	408.37	97	#1/1	#0/1	#0/0	#0/0	#0/0
Scaffold2	75155	A	G	410.2	97	#1/1	#0/1	#0/0	#0/0	#0/0
Scaffold2	75168	G	A	213.83	75	#1/1	#0/1	#0/0	#0/0	#0/0
Scaffold2	75176	G	A	22.84	73	#1/1	#0/1	#0/0	#0/0	#0/0
Scaffold2	75185	A	G	15.44	80	#1/1	#0/1	#0/0	#0/0	#0/0
Scaffold2	75194	T	C	17.6	89	#1/1	#0/1	#0/0	#0/0	#0/0
Scaffold2	88265	A	G	163.13	107	#1/1	#0/1	#0/0	#0/0	#0/0
Scaffold2	88273	T	G	166.13	109	#1/1	#0/1	#0/0	#0/0	#0/0
Scaffold2	88285	C	T	166.13	111	#1/1	#0/1	#0/0	#0/0	#0/0
Scaffold2	88288	A	G	163.13	113	#1/1	#0/1	#0/0	#0/0	#0/0
Scaffold2	88296	T	C	157.13	114	#1/1	#0/1	#0/0	#0/0	#0/0
Scaffold2	88301	A	G	160.13	114	#1/1	#0/1	#0/0	#0/0	#0/0
Scaffold2	88315	T	C	148.13	118	#1/1	#0/1	#0/0	#0/0	#0/0
Scaffold2	315512	T	C	109.22	14	#1/1	#0/1	#0/0	#0/0	#0/0
Scaffold2	461602	C	T	206.48	54	#1/1	#0/1	#0/0	#0/0	#0/0
Scaffold2	571888	C	A	24.24	83	#1/1	#0/1	#0/0	#0/0	#0/0
Scaffold2	584794	T	C	196.58	94	#1/1	#0/1	#0/0	#0/0	#0/0
Scaffold2	584797	G	A	160.16	88	#1/1	#0/1	#0/0	#0/0	#0/0
Scaffold2	584806	C	A	148.13	88	#1/1	#0/1	#0/0	#0/0	#0/0
Scaffold2	584811	G	T	195.16	87	#1/1	#0/1	#0/0	#0/0	#0/0
Scaffold2	584812	A	C	195.16	88	#1/1	#0/1	#0/0	#0/0	#0/0
Scaffold2	680812	G	A	113.23	80	#1/1	#0/1	#0/0	#0/0	#0/0
Scaffold2	693116	C	T	399.05	106	#1/1	#0/1	#0/0	#0/0	#0/0
Scaffold2	819774	G	C	30.6	68	#1/1	#0/1	#0/0	#0/0	#0/0
Scaffold2	1204455	T	C	141.13	97	#1/1	#0/1	#0/0	#0/0	#0/0
Scaffold2	1424712	C	T	165.84	75	#1/1	#0/1	#0/0	#0/0	#0/0
Scaffold2	1476223	T	C	937.05	123	#1/1	#0/1	#0/0	#0/0	#0/0
Scaffold2	1476232	G	A	771.05	112	#1/1	#0/1	#0/0	#0/0	#0/0
Scaffold2	1541798	A	G	197.29	95	#1/1	#0/1	#0/0	#0/0	#0/0
Scaffold2	1623986	T	C	167.09	58	#1/1	#0/1	#0/0	#0/0	#0/0
Scaffold2	1623999	G	T	264.5	63	#1/1	#0/1	#0/0	#0/0	#0/0
Scaffold2	1624021	T	C	211.16	61	#1/1	#0/1	#0/0	#0/0	#0/0
Scaffold2	1624046	T	A	2386.16	63	#0/0	#0/1	#1/1	#1/1	#1/1
Scaffold2	1648218	T	C	31.8	90	#1/1	#0/1	#0/0	#0/0	#0/0
Scaffold2	1649121	A	G	59.72	108	#1/1	#0/1	#0/0	#0/0	#0/0
Scaffold2	2316020	T	C	549.56	18	#0/0	#0/1	#1/1	#1/1	#1/1
Scaffold2	2327587	A	G	157.43	97	#1/1	#0/1	#0/0	#0/0	#0/0
Scaffold2	2327628	G	C	65.84	93	#1/1	#0/1	#0/0	#0/0	#0/0
Scaffold2	2341909	T	G	240.91	128	#1/1	#0/1	#0/0	#0/0	#0/0
Scaffold2	2443232	A	G	463.23	125	#1/1	#0/1	#0/0	#0/0	#0/0
Scaffold2	2531600	G	T	150.11	108	#1/1	#0/1	#0/0	#0/0	#0/0
Scaffold2	2531601	G	A	150.11	109	#1/1	#0/1	#0/0	#0/0	#0/0
Scaffold2	2536921	C	T	209.82	48	#1/1	#0/1	#0/0	#0/0	#0/0
Scaffold2	2536932	G	A	386.32	66	#1/1	#0/1	#0/0	#0/0	#0/0
Scaffold2	2536935	C	T	386.4	69	#1/1	#0/1	#0/0	#0/0	#0/0
Scaffold2	3405088	T	C	481.93	128	#1/1	#0/1	#0/0	#0/0	#0/0
Scaffold2	3405093	A	G	475.93	131	#1/1	#0/1	#0/0	#0/0	#0/0
Scaffold2	3405097	G	T	430.95	130	#1/1	#0/1	#0/0	#0/0	#0/0
Scaffold2	3431623	G	T	134.13	118	#1/1	#0/1	#0/0	#0/0	#0/0
Scaffold2	3432292	T	G	185.99	126	#1/1	#0/1	#0/0	#0/0	#0/0
Scaffold2	3435375	G	A	1087.98	128	#1/1	#0/1	#0/0	#0/0	#0/0
Scaffold2	3435379	A	G	1113.98	128	#1/1	#0/1	#0/0	#0/0	#0/0
Scaffold2	3435381	A	T	1113.98	132	#1/1	#0/1	#0/0	#0/0	#0/0
Scaffold2	3435429	C	T	500.22	123	#1/1	#0/1	#0/0	#0/0	#0/0
Scaffold2	3435430	G	A	500.22	120	#1/1	#0/1	#0/0	#0/0	#0/0
Scaffold2	3435437	A	G	335.46	121	#1/1	#0/1	#0/0	#0/0	#0/0
Scaffold2	3435450	G	A	282.43	115	#1/1	#0/1	#0/0	#0/0	#0/0
Scaffold2	3437377	G	A	692.21	128	#1/1	#0/1	#0/0	#0/0	#0/0
Scaffold2	3437398	G	A	721.9	129	#1/1	#0/1	#0/0	#0/0	#0/0
Scaffold2	3756538	C	T	207.26	16	#1/1	#0/1	#0/0	#0/0	#0/0
Scaffold20	58517	T	G	42.67	17	#1/1	#0/1	#0/0	#0/0	#0/0
Scaffold20	426953	C	T	284.81	126	#1/1	#0/1	#0/0	#0/0	#0/0
Scaffold20	426957	A	G	281.68	130	#1/1	#0/1	#0/0	#0/0	#0/0
Scaffold20	426959	T	C	284.68	128	#1/1	#0/1	#0/0	#0/0	#0/0
Scaffold20	544540	C	T	250.53	22	#1/1	#0/1	#0/0	#0/0	#0/0
Scaffold21	50637	T	A	959.21	123	#1/1	#0/1	#0/0	#0/0	#0/0
Scaffold21	125622	A	G	563.22	120	#1/1	#0/1	#0/0	#0/0	#0/0
Scaffold21	125644	T	C	62.44	92	#1/1	#0/1	#0/0	#0/0	#0/0
Scaffold21	368148	A	G	65.99	82	#1/1	#0/1	#0/0	#0/0	#0/0
Scaffold22	93917	C	T	817.9	108	#1/1	#0/1	#0/0	#0/0	#0/0
Scaffold22	93921	C	G	731.57	106	#1/1	#0/1	#0/0	#0/0	#0/0
Scaffold22	93928	G	A	356.08	106	#1/1	#0/1	#0/0	#0/0	#0/0
Scaffold22	93931	G	A	448.11	106	#1/1	#0/1	#0/0	#0/0	#0/0
Scaffold22	93944	T	C	416.27	90	#1/1	#0/1	#0/0	#0/0	#0/0
Scaffold22	93951	G	C	500.34	91	#1/1	#0/1	#0/0	#0/0	#0/0
Scaffold22	93952	A	G	586.92	92	#1/1	#0/1	#0/0	#0/0	#0/0
Scaffold22	93958	C	T	720.05	98	#1/1	#0/1	#0/0	#0/0	#0/0
Scaffold22	93963	T	C	987.05	104	#1/1	#0/1	#0/0	#0/0	#0/0
Scaffold22	93973	A	C	1018.9	114	#1/1	#0/1	#0/0	#0/0	#0/0
Scaffold22	98833	C	T	60.73	96	#1/1	#0/1	#0/0	#0/0	#0/0
Scaffold22	98839	C	T	60.94	96	#1/1	#0/1	#0/0	#0/0	#0/0
Scaffold22	101618	G	A	286.5	102	#1/1	#0/1	#0/0	#0/0	#0/0
Scaffold22	101630	G	C	254.5	106	#1/1	#0/1	#0/0	#0/0	#0/0
Scaffold22	101645	A	T	172.62	95	#1/1	#0/1	#0/0	#0/0	#0/0
Scaffold22	105388	T	C	239.62	148	#1/1	#0/1	#0/0	#0/0	#0/0
Scaffold22	105396	T	G	232.65	162	#1/1	#0/1	#0/0	#0/0	#0/0
Scaffold22	105426	C	T	473.29	201	#1/1	#0/1	#0/0	#0/0	#0/0
Scaffold22	105427	A	G	473.29	201	#1/1	#0/1	#0/0	#0/0	#0/0
Scaffold22	105793	A	T	797.94	321	#1/1	#0/1	#0/0	#0/0	#0/0
Scaffold22	105814	G	A	387.95	277	#1/1	#0/1	#0/0	#0/0	#0/0
Scaffold22	186288	A	G	1010.05	157	#1/1	#0/1	#0/0	#0/0	#0/0
Scaffold22	186294	A	G	933.05	153	#1/1	#0/1	#0/0	#0/0	#0/0
Scaffold22	186306	C	T	891.05	148	#1/1	#0/1	#0/0	#0/0	#0/0
Scaffold22	186310	A	G	849.05	145	#1/1	#0/1	#0/0	#0/0	#0/0
Scaffold22	186317	T	C	759.05	144	#1/1	#0/1	#0/0	#0/0	#0/0
Scaffold22	186319	T	C	756.05	144	#1/1	#0/1	#0/0	#0/0	#0/0
Scaffold22	186324	T	C	666.05	146	#1/1	#0/1	#0/0	#0/0	#0/0
Scaffold22	186340	C	T	450.07	131	#1/1	#0/1	#0/0	#0/0	#0/0
Scaffold22	186344	A	T	356.36	126	#1/1	#0/1	#0/0	#0/0	#0/0
Scaffold22	186346	A	T	359.65	124	#1/1	#0/1	#0/0	#0/0	#0/0
Scaffold22	186354	C	G	330.86	125	#1/1	#0/1	#0/0	#0/0	#0/0
Scaffold22	197733	C	T	1532.92	159	#1/1	#0/1	#0/0	#0/0	#0/0
Scaffold22	197734	A	G	1532.58	157	#1/1	#0/1	#0/0	#0/0	#0/0
Scaffold22	228093	T	C	351.88	128	#1/1	#0/1	#0/0	#0/0	#0/0
Scaffold22	244940	G	A	142.57	71	#1/1	#0/1	#0/0	#0/0	#0/0
Scaffold22	299625	C	T	503.22	130	#1/1	#0/1	#0/0	#0/0	#0/0
Scaffold22	299636	C	T	317.09	135	#1/1	#0/1	#0/0	#0/0	#0/0
Scaffold22	299731	G	A	548.22	122	#1/1	#0/1	#0/0	#0/0	#0/0
Scaffold22	299925	A	G	910.9	132	#1/1	#0/1	#0/0	#0/0	#0/0
Scaffold23	255133	C	T	187.26	96	#1/1	#0/1	#0/0	#0/0	#0/0
Scaffold23	255661	C	T	103.42	74	#1/1	#0/1	#0/0	#0/0	#0/0
Scaffold23	255672	A	G	157.34	77	#1/1	#0/1	#0/0	#0/0	#0/0
Scaffold23	255678	T	C	163.41	74	#1/1	#0/1	#0/0	#0/0	#0/0
Scaffold25	105315	A	G	333.17	149	#1/1	#0/1	#0/0	#0/0	#0/0
Scaffold25	107315	A	T	457.21	100	#1/1	#0/1	#0/0	#0/0	#0/0
Scaffold26	30736	C	T	62.07	103	#1/1	#0/1	#0/0	#0/0	#0/0
Scaffold26	36877	T	C	335.53	115	#1/1	#0/1	#0/0	#0/0	#0/0
Scaffold26	36907	A	G	92.69	117	#1/1	#0/1	#0/0	#0/0	#0/0
Scaffold27	20909	C	T	359.3	89	#1/1	#0/1	#0/0	#0/0	#0/0
Scaffold27	20923	C	T	230.79	89	#1/1	#0/1	#0/0	#0/0	#0/0
Scaffold27	20926	G	A	196.02	88	#1/1	#0/1	#0/0	#0/0	#0/0
Scaffold27	42180	G	A	1873.1	52	#0/0	#0/1	#1/1	#1/1	#1/1
Scaffold3	18257	A	G	961.96	208	#1/1	#0/1	#0/0	#0/0	#0/0
Scaffold3	31680	T	C	181.17	45	#1/1	#0/1	#0/0	#0/0	#0/0
Scaffold3	37819	C	T	96.08	122	#1/1	#0/1	#0/0	#0/0	#0/0
Scaffold3	37853	G	A	121.2	100	#1/1	#0/1	#0/0	#0/0	#0/0
Scaffold3	38487	A	G	35.46	32	#1/1	#0/1	#0/0	#0/0	#0/0
Scaffold3	912551	T	C	180.27	106	#1/1	#0/1	#0/0	#0/0	#0/0
Scaffold3	912553	G	A	180.26	102	#1/1	#0/1	#0/0	#0/0	#0/0
Scaffold3	951136	A	G	34.28	77	#1/1	#0/1	#0/0	#0/0	#0/0
Scaffold3	951137	C	A	33.89	75	#1/1	#0/1	#0/0	#0/0	#0/0
Scaffold3	2187925	G	A	240.16	135	#1/1	#0/1	#0/0	#0/0	#0/0
Scaffold3	2187931	A	G	240.17	131	#1/1	#0/1	#0/0	#0/0	#0/0
Scaffold3	2187937	C	T	240.16	132	#1/1	#0/1	#0/0	#0/0	#0/0
Scaffold3	2187940	A	G	240.16	130	#1/1	#0/1	#0/0	#0/0	#0/0
Scaffold3	2187946	C	T	240.16	128	#1/1	#0/1	#0/0	#0/0	#0/0
Scaffold3	2187950	A	G	240.19	128	#1/1	#0/1	#0/0	#0/0	#0/0
Scaffold3	2187977	T	C	192.16	119	#1/1	#0/1	#0/0	#0/0	#0/0
Scaffold3	2187989	T	C	144.21	116	#1/1	#0/1	#0/0	#0/0	#0/0
Scaffold3	2187990	G	C	115.19	117	#1/1	#0/1	#0/0	#0/0	#0/0
Scaffold3	2188579	G	T	249.51	138	#1/1	#0/1	#0/0	#0/0	#0/0
Scaffold3	2188587	A	G	215.58	124	#1/1	#0/1	#0/0	#0/0	#0/0
Scaffold3	2193651	C	A	933.43	27	#0/0	#0/1	#1/1	#1/1	#1/1
Scaffold3	2196170	A	G	320.76	118	#1/1	#0/1	#0/0	#0/0	#0/0
Scaffold3	2197900	A	G	64.47	115	#1/1	#0/1	#0/0	#0/0	#0/0
Scaffold3	2198702	C	A	102.22	110	#1/1	#0/1	#0/0	#0/0	#0/0
Scaffold3	2210213	C	T	36.5	94	#1/1	#0/1	#0/0	#0/0	#0/0
Scaffold3	2212645	G	C	180.64	112	#1/1	#0/1	#0/0	#0/0	#0/0
Scaffold3	2212656	G	A	193.23	112	#1/1	#0/1	#0/0	#0/0	#0/0
Scaffold3	2212664	C	T	202.23	106	#1/1	#0/1	#0/0	#0/0	#0/0
Scaffold3	2212677	G	C	110.1	107	#1/1	#0/1	#0/0	#0/0	#0/0
Scaffold3	2212688	G	A	144.4	103	#1/1	#0/1	#0/0	#0/0	#0/0
Scaffold3	2212695	A	C	79.99	101	#1/1	#0/1	#0/0	#0/0	#0/0
Scaffold3	2219131	G	A	450.51	150	#1/1	#0/1	#0/0	#0/0	#0/0
Scaffold3	2219639	G	A	2039.9	178	#1/1	#0/1	#0/0	#0/0	#0/0
Scaffold3	2219652	A	G	1955.9	174	#1/1	#0/1	#0/0	#0/0	#0/0
Scaffold3	2219738	T	C	2262.9	152	#1/1	#0/1	#0/0	#0/0	#0/0
Scaffold3	2219752	C	T	2433.9	159	#1/1	#0/1	#0/0	#0/0	#0/0
Scaffold3	2220018	A	G	2453.9	175	#1/1	#0/1	#0/0	#0/0	#0/0
Scaffold3	2220145	C	G	2495.9	168	#1/1	#0/1	#0/0	#0/0	#0/0
Scaffold3	2220168	C	T	2260.9	165	#1/1	#0/1	#0/0	#0/0	#0/0
Scaffold3	2220211	C	A	2173.9	171	#1/1	#0/1	#0/0	#0/0	#0/0
Scaffold3	2220244	A	T	2470.9	179	#1/1	#0/1	#0/0	#0/0	#0/0
Scaffold3	2220249	C	A	2467.9	181	#1/1	#0/1	#0/0	#0/0	#0/0
Scaffold3	2220317	A	C	2358.9	180	#1/1	#0/1	#0/0	#0/0	#0/0
Scaffold3	2220331	C	T	2353.9	181	#1/1	#0/1	#0/0	#0/0	#0/0
Scaffold3	2220332	C	T	2311.9	181	#1/1	#0/1	#0/0	#0/0	#0/0
Scaffold3	2220400	G	T	2156.9	183	#1/1	#0/1	#0/0	#0/0	#0/0
Scaffold3	2220474	T	C	1410.9	142	#1/1	#0/1	#0/0	#0/0	#0/0
Scaffold3	2220563	C	A	1345.9	152	#1/1	#0/1	#0/0	#0/0	#0/0
Scaffold3	2220588	A	C	1248.9	152	#1/1	#0/1	#0/0	#0/0	#0/0
Scaffold3	2220635	T	G	1579.9	178	#1/1	#0/1	#0/0	#0/0	#0/0
Scaffold3	2220865	A	G	371.08	125	#1/1	#0/1	#0/0	#0/0	#0/0
Scaffold3	2221106	G	A	725.9	127	#1/1	#0/1	#0/0	#0/0	#0/0
Scaffold3	2221145	A	G	1083.9	127	#1/1	#0/1	#0/0	#0/0	#0/0
Scaffold3	2221214	G	T	1262.9	133	#1/1	#0/1	#0/0	#0/0	#0/0
Scaffold3	2221225	T	A	1170.9	136	#1/1	#0/1	#0/0	#0/0	#0/0
Scaffold3	2221265	A	T	839.9	127	#1/1	#0/1	#0/0	#0/0	#0/0
Scaffold3	2221277	T	A	842.9	134	#1/1	#0/1	#0/0	#0/0	#0/0
Scaffold3	2221280	C	T	842.9	131	#1/1	#0/1	#0/0	#0/0	#0/0
Scaffold3	2221352	A	G	1012.9	113	#1/1	#0/1	#0/0	#0/0	#0/0
Scaffold3	2221377	T	C	929.6	106	#1/1	#0/1	#0/0	#0/0	#0/0
Scaffold3	2221393	C	A	791.79	105	#1/1	#0/1	#0/0	#0/0	#0/0
Scaffold3	2221576	G	C	1474.9	151	#1/1	#0/1	#0/0	#0/0	#0/0
Scaffold3	2221577	A	C	1474.9	150	#1/1	#0/1	#0/0	#0/0	#0/0
Scaffold3	2221580	C	T	1438.9	151	#1/1	#0/1	#0/0	#0/0	#0/0
Scaffold3	2221584	G	C	1395.9	145	#1/1	#0/1	#0/0	#0/0	#0/0
Scaffold3	2221599	A	G	1255.9	140	#1/1	#0/1	#0/0	#0/0	#0/0
Scaffold3	2221632	T	A	1217.9	133	#1/1	#0/1	#0/0	#0/0	#0/0
Scaffold3	2221755	T	A	2047.9	151	#1/1	#0/1	#0/0	#0/0	#0/0
Scaffold3	2221784	T	A	2219.9	158	#1/1	#0/1	#0/0	#0/0	#0/0
Scaffold3	2221785	A	C	2219.9	159	#1/1	#0/1	#0/0	#0/0	#0/0
Scaffold3	2223482	A	T	234.79	109	#1/1	#0/1	#0/0	#0/0	#0/0
Scaffold3	2279451	C	A	192.33	96	#1/1	#0/1	#0/0	#0/0	#0/0
Scaffold3	2279459	C	T	195.26	97	#1/1	#0/1	#0/0	#0/0	#0/0
Scaffold3	2279463	T	C	239.77	97	#1/1	#0/1	#0/0	#0/0	#0/0
Scaffold3	2279471	A	G	245.77	103	#1/1	#0/1	#0/0	#0/0	#0/0
Scaffold3	2344004	G	A	383.31	90	#1/1	#0/1	#0/0	#0/0	#0/0
Scaffold3	2344009	C	T	476.23	95	#1/1	#0/1	#0/0	#0/0	#0/0
Scaffold3	2344010	A	C	521.22	95	#1/1	#0/1	#0/0	#0/0	#0/0
Scaffold3	2344014	A	T	479.47	93	#1/1	#0/1	#0/0	#0/0	#0/0
Scaffold3	2344017	G	A	431.34	89	#1/1	#0/1	#0/0	#0/0	#0/0
Scaffold3	2344018	A	T	430.95	91	#1/1	#0/1	#0/0	#0/0	#0/0
Scaffold3	2366320	G	A	277.35	113	#1/1	#0/1	#0/0	#0/0	#0/0
Scaffold3	2366329	A	G	322.24	110	#1/1	#0/1	#0/0	#0/0	#0/0
Scaffold3	2366331	C	A	322.24	110	#1/1	#0/1	#0/0	#0/0	#0/0
Scaffold3	2366338	G	A	404.95	111	#1/1	#0/1	#0/0	#0/0	#0/0
Scaffold3	2408025	A	G	960.57	123	#1/1	#0/1	#0/0	#0/0	#0/0
Scaffold3	2860812	G	A	45.55	158	#1/1	#0/1	#0/0	#0/0	#0/0
Scaffold3	2860823	T	C	79.21	173	#1/1	#0/1	#0/0	#0/0	#0/0
Scaffold3	2860826	T	C	79.21	175	#1/1	#0/1	#0/0	#0/0	#0/0
Scaffold3	2861050	C	T	77.6	127	#1/1	#0/1	#0/0	#0/0	#0/0
Scaffold3	2861132	C	T	119.56	146	#1/1	#0/1	#0/0	#0/0	#0/0
Scaffold3	3023324	C	T	202.58	110	#1/1	#0/1	#0/0	#0/0	#0/0
Scaffold3	3023343	C	T	368.28	109	#1/1	#0/1	#0/0	#0/0	#0/0
Scaffold3	3023345	G	A	365.71	108	#1/1	#0/1	#0/0	#0/0	#0/0
Scaffold3	3023399	C	T	376.94	115	#1/1	#0/1	#0/0	#0/0	#0/0
Scaffold3	3035854	A	G	227.57	105	#1/1	#0/1	#0/0	#0/0	#0/0
Scaffold3	3035856	G	C	227.88	101	#1/1	#0/1	#0/0	#0/0	#0/0
Scaffold3	3035863	C	T	226.64	105	#1/1	#0/1	#0/0	#0/0	#0/0
Scaffold3	3037967	T	C	284.08	94	#1/1	#0/1	#0/0	#0/0	#0/0
Scaffold3	3061379	C	T	3336.09	77	#0/0	#0/1	#1/1	#1/1	#1/1
Scaffold3	3537499	T	C	423.57	120	#1/1	#0/1	#0/0	#0/0	#0/0
Scaffold3	3538603	C	T	183.27	94	#1/1	#0/1	#0/0	#0/0	#0/0
Scaffold3	3538606	T	C	183.27	95	#1/1	#0/1	#0/0	#0/0	#0/0
Scaffold3	3538610	A	G	145.12	96	#1/1	#0/1	#0/0	#0/0	#0/0
Scaffold3	3538669	G	T	166.44	108	#1/1	#0/1	#0/0	#0/0	#0/0
Scaffold3	3538681	A	G	177.44	105	#1/1	#0/1	#0/0	#0/0	#0/0
Scaffold3	3538688	T	C	174.2	109	#1/1	#0/1	#0/0	#0/0	#0/0
Scaffold3	3539178	C	A	401.28	122	#1/1	#0/1	#0/0	#0/0	#0/0
Scaffold3	3540053	T	C	183.19	112	#1/1	#0/1	#0/0	#0/0	#0/0
Scaffold3	3540054	G	A	180.22	110	#1/1	#0/1	#0/0	#0/0	#0/0
Scaffold3	3540061	C	T	136.13	108	#1/1	#0/1	#0/0	#0/0	#0/0
Scaffold3	3540065	T	C	136.13	109	#1/1	#0/1	#0/0	#0/0	#0/0
Scaffold3	3540075	T	C	124.14	112	#1/1	#0/1	#0/0	#0/0	#0/0
Scaffold3	3540076	T	C	121.14	115	#1/1	#0/1	#0/0	#0/0	#0/0
Scaffold3	3540095	A	G	74.62	114	#1/1	#0/1	#0/0	#0/0	#0/0
Scaffold4	286224	G	T	503.36	109	#1/1	#0/1	#0/0	#0/0	#0/0
Scaffold4	400724	T	G	407.23	94	#1/1	#0/1	#0/0	#0/0	#0/0
Scaffold4	401376	C	T	325.1	150	#1/1	#0/1	#0/0	#0/0	#0/0
Scaffold4	704410	C	T	532.92	108	#1/1	#0/1	#0/0	#0/0	#0/0
Scaffold4	790269	G	T	196.15	94	#1/1	#0/1	#0/0	#0/0	#0/0
Scaffold4	790300	C	G	98.59	85	#1/1	#0/1	#0/0	#0/0	#0/0
Scaffold4	790301	T	A	98.59	85	#1/1	#0/1	#0/0	#0/0	#0/0
Scaffold4	795431	T	C	685.06	117	#1/1	#0/1	#0/0	#0/0	#0/0
Scaffold4	795454	C	T	622.91	127	#1/1	#0/1	#0/0	#0/0	#0/0
Scaffold4	795457	A	C	622.91	126	#1/1	#0/1	#0/0	#0/0	#0/0
Scaffold4	823184	C	T	133.13	110	#1/1	#0/1	#0/0	#0/0	#0/0
Scaffold4	823185	T	C	133.13	110	#1/1	#0/1	#0/0	#0/0	#0/0
Scaffold4	823211	G	A	219.58	103	#1/1	#0/1	#0/0	#0/0	#0/0
Scaffold4	827897	C	A	360.36	112	#1/1	#0/1	#0/0	#0/0	#0/0
Scaffold4	827914	T	G	320.26	100	#1/1	#0/1	#0/0	#0/0	#0/0
Scaffold4	827940	G	A	447.93	97	#1/1	#0/1	#0/0	#0/0	#0/0
Scaffold4	877071	G	A	92.42	78	#1/1	#0/1	#0/0	#0/0	#0/0
Scaffold4	926205	G	C	213.52	94	#1/1	#0/1	#0/0	#0/0	#0/0
Scaffold4	936844	C	T	1465.34	45	#0/0	#0/1	#1/1	#1/1	#1/1
Scaffold4	937339	C	T	2220.99	62	#0/0	#0/1	#1/1	#1/1	#1/1
Scaffold4	2673822	T	C	374.3	116	#1/1	#0/1	#0/0	#0/0	#0/0
Scaffold4	2673824	C	G	374.3	114	#1/1	#0/1	#0/0	#0/0	#0/0
Scaffold4	2674010	A	G	109.61	102	#1/1	#0/1	#0/0	#0/0	#0/0
Scaffold4	2674012	A	G	112.24	102	#1/1	#0/1	#0/0	#0/0	#0/0
Scaffold4	2674030	G	C	324.26	107	#1/1	#0/1	#0/0	#0/0	#0/0
Scaffold4	2674033	G	A	324.26	116	#1/1	#0/1	#0/0	#0/0	#0/0
Scaffold4	2676106	G	A	305.26	121	#1/1	#0/1	#0/0	#0/0	#0/0
Scaffold4	2676135	C	T	449.95	131	#1/1	#0/1	#0/0	#0/0	#0/0
Scaffold4	2682646	A	C	147.66	91	#1/1	#0/1	#0/0	#0/0	#0/0
Scaffold4	2682881	C	T	143.67	90	#1/1	#0/1	#0/0	#0/0	#0/0
Scaffold4	2693377	A	T	314.36	115	#1/1	#0/1	#0/0	#0/0	#0/0
Scaffold4	2693379	G	T	314.36	116	#1/1	#0/1	#0/0	#0/0	#0/0
Scaffold4	2693385	C	A	404.25	114	#1/1	#0/1	#0/0	#0/0	#0/0
Scaffold4	2693408	G	A	632.21	113	#1/1	#0/1	#0/0	#0/0	#0/0
Scaffold4	2693413	G	A	629.21	114	#1/1	#0/1	#0/0	#0/0	#0/0
Scaffold4	2699179	T	A	1023.87	155	#1/1	#0/1	#0/0	#0/0	#0/0
Scaffold4	2699348	C	T	110.61	123	#1/1	#0/1	#0/0	#0/0	#0/0
Scaffold4	2708128	T	C	206.61	125	#1/1	#0/1	#0/0	#0/0	#0/0
Scaffold4	2708137	A	G	162.2	118	#1/1	#0/1	#0/0	#0/0	#0/0
Scaffold4	2717815	G	A	90.43	106	#1/1	#0/1	#0/0	#0/0	#0/0
Scaffold4	2717959	G	A	144.35	111	#1/1	#0/1	#0/0	#0/0	#0/0
Scaffold4	2718796	A	G	100.83	140	#1/1	#0/1	#0/0	#0/0	#0/0
Scaffold4	2720578	C	A	189.6	133	#1/1	#0/1	#0/0	#0/0	#0/0
Scaffold4	2720582	T	A	192.51	133	#1/1	#0/1	#0/0	#0/0	#0/0
Scaffold4	2722619	G	A	56.67	111	#1/1	#0/1	#0/0	#0/0	#0/0
Scaffold4	2732948	A	G	269.29	106	#1/1	#0/1	#0/0	#0/0	#0/0
Scaffold4	2738933	C	T	893.21	146	#1/1	#0/1	#0/0	#0/0	#0/0
Scaffold4	2738942	T	C	1232.21	161	#1/1	#0/1	#0/0	#0/0	#0/0
Scaffold4	2738955	G	A	1326.21	160	#1/1	#0/1	#0/0	#0/0	#0/0
Scaffold4	2747106	G	A	383.77	101	#1/1	#0/1	#0/0	#0/0	#0/0
Scaffold4	2747116	A	G	470.36	111	#1/1	#0/1	#0/0	#0/0	#0/0
Scaffold4	2747125	C	T	542.28	119	#1/1	#0/1	#0/0	#0/0	#0/0
Scaffold4	2747126	A	G	545.28	120	#1/1	#0/1	#0/0	#0/0	#0/0
Scaffold4	2747137	T	A	775.22	131	#1/1	#0/1	#0/0	#0/0	#0/0
Scaffold4	2780320	T	A	137.13	109	#1/1	#0/1	#0/0	#0/0	#0/0
Scaffold4	2802977	C	T	401.28	186	#1/1	#0/1	#0/0	#0/0	#0/0
Scaffold4	2802980	G	T	403.78	189	#1/1	#0/1	#0/0	#0/0	#0/0
Scaffold4	2803005	G	A	264.25	213	#1/1	#0/1	#0/0	#0/0	#0/0
Scaffold4	2803009	G	A	226.58	212	#1/1	#0/1	#0/0	#0/0	#0/0
Scaffold4	2808574	G	A	66.8	144	#1/1	#0/1	#0/0	#0/0	#0/0
Scaffold4	2809569	C	T	182.26	49	#1/1	#0/1	#0/0	#0/0	#0/0
Scaffold4	2829779	G	A	1756.9	144	#1/1	#0/1	#0/0	#0/0	#0/0
Scaffold4	2829796	A	G	2048.9	155	#1/1	#0/1	#0/0	#0/0	#0/0
Scaffold4	2829817	C	G	2314.9	150	#1/1	#0/1	#0/0	#0/0	#0/0
Scaffold4	2829823	A	G	2313.9	147	#1/1	#0/1	#0/0	#0/0	#0/0
Scaffold4	2857598	C	T	61.55	152	#1/1	#0/1	#0/0	#0/0	#0/0
Scaffold4	2860640	C	T	392.09	126	#1/1	#0/1	#0/0	#0/0	#0/0
Scaffold4	2860678	C	T	733.9	135	#1/1	#0/1	#0/0	#0/0	#0/0
Scaffold4	2861561	T	C	403.1	111	#1/1	#0/1	#0/0	#0/0	#0/0
Scaffold4	2869913	T	C	471.99	122	#1/1	#0/1	#0/0	#0/0	#0/0
Scaffold4	2869924	C	T	439.08	121	#1/1	#0/1	#0/0	#0/0	#0/0
Scaffold4	2869940	C	G	320.25	120	#1/1	#0/1	#0/0	#0/0	#0/0
Scaffold4	2869941	A	G	320.25	120	#1/1	#0/1	#0/0	#0/0	#0/0
Scaffold4	2869946	A	G	320.25	119	#1/1	#0/1	#0/0	#0/0	#0/0
Scaffold4	2869962	A	G	212.58	125	#1/1	#0/1	#0/0	#0/0	#0/0
Scaffold4	2869963	G	A	212.58	125	#1/1	#0/1	#0/0	#0/0	#0/0
Scaffold4	2928481	T	C	714.37	137	#1/1	#0/1	#0/0	#0/0	#0/0
Scaffold4	2938874	C	T	246.5	126	#1/1	#0/1	#0/0	#0/0	#0/0
Scaffold4	2939657	C	T	459.25	117	#1/1	#0/1	#0/0	#0/0	#0/0
Scaffold4	2939660	T	A	459.25	119	#1/1	#0/1	#0/0	#0/0	#0/0
Scaffold4	2971861	C	T	412.09	72	#1/1	#0/1	#0/0	#0/0	#0/0
Scaffold4	2973660	C	T	509.07	116	#1/1	#0/1	#0/0	#0/0	#0/0
Scaffold4	2974746	A	G	184.5	93	#1/1	#0/1	#0/0	#0/0	#0/0
Scaffold4	2984235	A	G	132.24	69	#1/1	#0/1	#0/0	#0/0	#0/0
Scaffold4	2984504	A	C	169.84	40	#1/1	#0/1	#0/0	#0/0	#0/0
Scaffold4	2984526	A	G	171.79	43	#1/1	#0/1	#0/0	#0/0	#0/0
Scaffold4	2984530	C	T	173.82	41	#1/1	#0/1	#0/0	#0/0	#0/0
Scaffold4	2985266	G	A	183.17	51	#1/1	#0/1	#0/0	#0/0	#0/0
Scaffold4	3013188	C	T	143.67	149	#1/1	#0/1	#0/0	#0/0	#0/0
Scaffold4	3013458	G	A	126.41	130	#1/1	#0/1	#0/0	#0/0	#0/0
Scaffold4	3017923	A	G	58.47	102	#1/1	#0/1	#0/0	#0/0	#0/0
Scaffold4	3021079	A	G	364.23	16	#0/0	#0/1	#1/1	#1/1	#1/1
Scaffold4	3038491	C	T	917.4	117	#1/1	#0/1	#0/0	#0/0	#0/0
Scaffold4	3067114	C	T	252.53	105	#1/1	#0/1	#0/0	#0/0	#0/0
Scaffold4	3067131	G	A	259.5	107	#1/1	#0/1	#0/0	#0/0	#0/0
Scaffold4	3104386	C	T	179.2	62	#1/1	#0/1	#0/0	#0/0	#0/0
Scaffold4	3184414	C	G	61.85	94	#1/1	#0/1	#0/0	#0/0	#0/0
Scaffold4	3310502	C	T	2253.39	75	#0/0	#0/1	#1/1	#1/1	#1/1
Scaffold4	3310617	A	C	224.85	61	#1/1	#0/1	#0/0	#0/0	#0/0
Scaffold4	3383756	C	T	166.17	67	#1/1	#0/1	#0/0	#0/0	#0/0
Scaffold4	3383759	C	T	170.9	67	#1/1	#0/1	#0/0	#0/0	#0/0
Scaffold4	3383760	A	G	175.21	67	#1/1	#0/1	#0/0	#0/0	#0/0
Scaffold4	3386846	T	C	98.59	103	#1/1	#0/1	#0/0	#0/0	#0/0
Scaffold4	3386862	T	C	98.62	100	#1/1	#0/1	#0/0	#0/0	#0/0
Scaffold4	3386884	T	A	77.59	100	#1/1	#0/1	#0/0	#0/0	#0/0
Scaffold4	3414805	T	C	103.33	71	#1/1	#0/1	#0/0	#0/0	#0/0
Scaffold4	3418879	C	T	41.2	17	#1/1	#0/1	#0/0	#0/0	#0/0
Scaffold5	649330	C	A	28.43	55	#1/1	#0/1	#0/0	#0/0	#0/0
Scaffold5	649338	G	A	65.3	66	#1/1	#0/1	#0/0	#0/0	#0/0
Scaffold5	696030	C	T	75.76	79	#1/1	#0/1	#0/0	#0/0	#0/0
Scaffold5	699163	C	G	64.6	81	#1/1	#0/1	#0/0	#0/0	#0/0
Scaffold5	699165	T	C	67.24	77	#1/1	#0/1	#0/0	#0/0	#0/0
Scaffold5	705002	C	T	228.27	96	#1/1	#0/1	#0/0	#0/0	#0/0
Scaffold5	705884	T	G	204.26	72	#1/1	#0/1	#0/0	#0/0	#0/0
Scaffold5	710489	T	C	136.28	88	#1/1	#0/1	#0/0	#0/0	#0/0
Scaffold5	710498	G	A	211.35	99	#1/1	#0/1	#0/0	#0/0	#0/0
Scaffold5	712552	C	T	82.07	87	#1/1	#0/1	#0/0	#0/0	#0/0
Scaffold5	712594	G	A	87.18	89	#1/1	#0/1	#0/0	#0/0	#0/0
Scaffold5	731971	C	T	1718.31	47	#0/0	#0/1	#1/1	#1/1	#1/1
Scaffold5	746878	C	T	183.3	91	#1/1	#0/1	#0/0	#0/0	#0/0
Scaffold5	839636	G	A	138.76	15	#1/1	#0/1	#0/0	#0/0	#0/0
Scaffold5	863412	A	C	102.42	76	#1/1	#0/1	#0/0	#0/0	#0/0
Scaffold5	865145	G	A	2654.71	70	#0/0	#0/1	#1/1	#1/1	#1/1
Scaffold5	865401	T	C	290.25	88	#1/1	#0/1	#0/0	#0/0	#0/0
Scaffold5	978221	T	C	66.55	66	#1/1	#0/1	#0/0	#0/0	#0/0
Scaffold5	978229	G	A	69.68	67	#1/1	#0/1	#0/0	#0/0	#0/0
Scaffold5	1029082	A	G	107.98	84	#1/1	#0/1	#0/0	#0/0	#0/0
Scaffold5	1029091	T	C	101.43	96	#1/1	#0/1	#0/0	#0/0	#0/0
Scaffold5	1029100	G	A	100.24	100	#1/1	#0/1	#0/0	#0/0	#0/0
Scaffold5	1029119	T	C	89.75	97	#1/1	#0/1	#0/0	#0/0	#0/0
Scaffold5	1037523	A	G	426.93	150	#1/1	#0/1	#0/0	#0/0	#0/0
Scaffold5	1047423	G	C	77.74	97	#1/1	#0/1	#0/0	#0/0	#0/0
Scaffold5	1125842	A	G	636.58	109	#1/1	#0/1	#0/0	#0/0	#0/0
Scaffold5	1125843	A	T	636.58	108	#1/1	#0/1	#0/0	#0/0	#0/0
Scaffold5	1125844	A	C	636.58	108	#1/1	#0/1	#0/0	#0/0	#0/0
Scaffold5	1232764	C	T	636.21	116	#1/1	#0/1	#0/0	#0/0	#0/0
Scaffold5	1232775	T	C	636.21	111	#1/1	#0/1	#0/0	#0/0	#0/0
Scaffold5	1232776	G	A	636.21	111	#1/1	#0/1	#0/0	#0/0	#0/0
Scaffold5	1232778	T	C	515.22	110	#1/1	#0/1	#0/0	#0/0	#0/0
Scaffold5	1317062	C	G	85.42	82	#1/1	#0/1	#0/0	#0/0	#0/0
Scaffold5	1317064	G	T	88.42	89	#1/1	#0/1	#0/0	#0/0	#0/0
Scaffold5	1349184	A	G	465.33	102	#1/1	#0/1	#0/0	#0/0	#0/0
Scaffold5	1349186	T	C	465.33	102	#1/1	#0/1	#0/0	#0/0	#0/0
Scaffold5	1361497	T	C	47.92	100	#1/1	#0/1	#0/0	#0/0	#0/0
Scaffold5	1373799	G	A	132.78	23	#1/1	#0/1	#0/0	#0/0	#0/0
Scaffold5	1373815	C	T	128.78	22	#1/1	#0/1	#0/0	#0/0	#0/0
Scaffold5	1373816	G	A	421.39	17	#0/0	#0/1	#1/1	#1/1	#1/1
Scaffold5	1379320	T	C	52.53	116	#1/1	#0/1	#0/0	#0/0	#0/0
Scaffold5	1379932	T	C	163.16	79	#1/1	#0/1	#0/0	#0/0	#0/0
Scaffold5	1396700	A	G	65.68	54	#1/1	#0/1	#0/0	#0/0	#0/0
Scaffold5	1397162	A	G	293.37	169	#1/1	#0/1	#0/0	#0/0	#0/0
Scaffold5	1397165	G	T	296.28	167	#1/1	#0/1	#0/0	#0/0	#0/0
Scaffold5	1399379	C	G	202.16	126	#1/1	#0/1	#0/0	#0/0	#0/0
Scaffold5	1414875	T	C	239.25	107	#1/1	#0/1	#0/0	#0/0	#0/0
Scaffold5	1440482	G	A	60.67	91	#1/1	#0/1	#0/0	#0/0	#0/0
Scaffold5	1440496	T	C	98.71	94	#1/1	#0/1	#0/0	#0/0	#0/0
Scaffold5	1535185	C	T	92.63	33	#1/1	#0/1	#0/0	#0/0	#0/0
Scaffold5	2284198	C	G	282.28	87	#1/1	#0/1	#0/0	#0/0	#0/0
Scaffold5	2284205	C	T	107.42	82	#1/1	#0/1	#0/0	#0/0	#0/0
Scaffold5	2284206	C	T	107.42	82	#1/1	#0/1	#0/0	#0/0	#0/0
Scaffold5	2284222	C	G	104.83	84	#1/1	#0/1	#0/0	#0/0	#0/0
Scaffold5	2284228	G	T	105.06	84	#1/1	#0/1	#0/0	#0/0	#0/0
Scaffold5	2284234	C	G	189.44	86	#1/1	#0/1	#0/0	#0/0	#0/0
Scaffold5	2284241	T	C	189.69	90	#1/1	#0/1	#0/0	#0/0	#0/0
Scaffold5	2295364	T	A	908.21	128	#1/1	#0/1	#0/0	#0/0	#0/0
Scaffold5	2295374	T	A	1037.21	136	#1/1	#0/1	#0/0	#0/0	#0/0
Scaffold5	2295382	C	T	1121.21	141	#1/1	#0/1	#0/0	#0/0	#0/0
Scaffold5	2303506	G	A	192.26	102	#1/1	#0/1	#0/0	#0/0	#0/0
Scaffold5	2303530	G	A	157.24	107	#1/1	#0/1	#0/0	#0/0	#0/0
Scaffold5	2303535	G	T	157.32	105	#1/1	#0/1	#0/0	#0/0	#0/0
Scaffold5	2303557	A	T	148.62	108	#1/1	#0/1	#0/0	#0/0	#0/0
Scaffold5	2303558	T	A	142.11	107	#1/1	#0/1	#0/0	#0/0	#0/0
Scaffold5	2303564	A	T	142.11	111	#1/1	#0/1	#0/0	#0/0	#0/0
Scaffold5	2303573	T	G	100.07	114	#1/1	#0/1	#0/0	#0/0	#0/0
Scaffold5	2303576	G	T	60.43	114	#1/1	#0/1	#0/0	#0/0	#0/0
Scaffold5	2481792	A	G	314.08	116	#1/1	#0/1	#0/0	#0/0	#0/0
Scaffold5	2774448	A	C	114.59	70	#1/1	#0/1	#0/0	#0/0	#0/0
Scaffold5	2961473	T	C	683.05	181	#1/1	#0/1	#0/0	#0/0	#0/0
Scaffold5	2993060	G	T	239.51	39	#1/1	#0/1	#0/0	#0/0	#0/0
Scaffold5	3501203	T	C	152.13	138	#1/1	#0/1	#0/0	#0/0	#0/0
Scaffold5	3501240	G	A	184.16	134	#1/1	#0/1	#0/0	#0/0	#0/0
Scaffold5	3501277	T	C	195.16	124	#1/1	#0/1	#0/0	#0/0	#0/0
Scaffold5	3501288	T	C	127.27	116	#1/1	#0/1	#0/0	#0/0	#0/0
Scaffold5	3511037	T	A	460.02	191	#1/1	#0/1	#0/0	#0/0	#0/0
Scaffold5	3511046	C	T	375.08	189	#1/1	#0/1	#0/0	#0/0	#0/0
Scaffold5	3511047	T	C	375.08	189	#1/1	#0/1	#0/0	#0/0	#0/0
Scaffold5	3511056	A	G	246.62	186	#1/1	#0/1	#0/0	#0/0	#0/0
Scaffold5	3534640	A	G	782.5	125	#1/1	#0/1	#0/0	#0/0	#0/0
Scaffold5	3534644	T	A	737.5	125	#1/1	#0/1	#0/0	#0/0	#0/0
Scaffold5	3534646	T	C	737.5	128	#1/1	#0/1	#0/0	#0/0	#0/0
Scaffold5	3552329	G	T	198.32	145	#1/1	#0/1	#0/0	#0/0	#0/0
Scaffold5	3556778	C	T	563	111	#1/1	#0/1	#0/0	#0/0	#0/0
Scaffold5	3563977	G	A	829.05	130	#1/1	#0/1	#0/0	#0/0	#0/0
Scaffold5	3565029	A	T	1166.9	136	#1/1	#0/1	#0/0	#0/0	#0/0
Scaffold5	3565033	T	C	1085.9	132	#1/1	#0/1	#0/0	#0/0	#0/0
Scaffold5	3565048	G	A	621.21	123	#1/1	#0/1	#0/0	#0/0	#0/0
Scaffold5	3565066	G	T	32.57	103	#1/1	#0/1	#0/0	#0/0	#0/0
Scaffold5	3604641	C	T	298.4	105	#1/1	#0/1	#0/0	#0/0	#0/0
Scaffold5	3633628	C	T	35.66	131	#1/1	#0/1	#0/0	#0/0	#0/0
Scaffold5	3736278	A	G	314.25	114	#1/1	#0/1	#0/0	#0/0	#0/0
Scaffold5	3747449	G	A	1304.21	152	#1/1	#0/1	#0/0	#0/0	#0/0
Scaffold5	3747521	A	G	2428.09	188	#1/1	#0/1	#0/0	#0/0	#0/0
Scaffold5	3815407	C	T	323.49	107	#1/1	#0/1	#0/0	#0/0	#0/0
Scaffold5	3853916	C	T	148.45	116	#1/1	#0/1	#0/0	#0/0	#0/0
Scaffold5	3853921	T	C	146.38	116	#1/1	#0/1	#0/0	#0/0	#0/0
Scaffold5	3853936	T	G	148.45	112	#1/1	#0/1	#0/0	#0/0	#0/0
Scaffold5	3853938	G	A	148.45	110	#1/1	#0/1	#0/0	#0/0	#0/0
Scaffold5	3853939	A	G	148.45	110	#1/1	#0/1	#0/0	#0/0	#0/0
Scaffold5	3853948	A	G	104.38	118	#1/1	#0/1	#0/0	#0/0	#0/0
Scaffold5	3853949	T	G	104.38	115	#1/1	#0/1	#0/0	#0/0	#0/0
Scaffold5	3885267	C	A	117.09	131	#1/1	#0/1	#0/0	#0/0	#0/0
Scaffold5	3928999	T	C	63.16	106	#1/1	#0/1	#0/0	#0/0	#0/0
Scaffold5	3929001	C	T	59.71	106	#1/1	#0/1	#0/0	#0/0	#0/0
Scaffold5	3929003	C	T	62.04	107	#1/1	#0/1	#0/0	#0/0	#0/0
Scaffold5	3929013	T	G	60.38	102	#1/1	#0/1	#0/0	#0/0	#0/0
Scaffold5	3929014	T	C	60.02	101	#1/1	#0/1	#0/0	#0/0	#0/0
Scaffold5	5308575	T	A	170.31	137	#1/1	#0/1	#0/0	#0/0	#0/0
Scaffold5	5308627	C	T	171.27	117	#1/1	#0/1	#0/0	#0/0	#0/0
Scaffold6	1913047	C	G	83.53	84	#1/1	#0/1	#0/0	#0/0	#0/0
Scaffold6	1920339	C	T	923.9	102	#1/1	#0/1	#0/0	#0/0	#0/0
Scaffold6	1986070	T	C	83.35	17	#1/1	#0/1	#0/0	#0/0	#0/0
Scaffold6	1986098	G	A	81.9	22	#1/1	#0/1	#0/0	#0/0	#0/0
Scaffold6	2039091	T	C	218.77	114	#1/1	#0/1	#0/0	#0/0	#0/0
Scaffold6	2039092	G	A	218.77	114	#1/1	#0/1	#0/0	#0/0	#0/0
Scaffold6	2039319	T	C	89.59	104	#1/1	#0/1	#0/0	#0/0	#0/0
Scaffold6	2039429	C	T	103.67	111	#1/1	#0/1	#0/0	#0/0	#0/0
Scaffold6	2039434	G	A	103.67	111	#1/1	#0/1	#0/0	#0/0	#0/0
Scaffold6	2039446	G	A	120.42	110	#1/1	#0/1	#0/0	#0/0	#0/0
Scaffold6	2040087	G	A	144.2	130	#1/1	#0/1	#0/0	#0/0	#0/0
Scaffold7	734286	T	C	328.75	35	#1/1	#0/1	#0/0	#0/0	#0/0
Scaffold7	830015	T	C	353.11	120	#1/1	#0/1	#0/0	#0/0	#0/0
Scaffold7	884914	G	A	423.6	84	#1/1	#0/1	#0/0	#0/0	#0/0
Scaffold7	943215	T	C	496.59	113	#1/1	#0/1	#0/0	#0/0	#0/0
Scaffold7	943217	T	C	412.6	112	#1/1	#0/1	#0/0	#0/0	#0/0
Scaffold7	1004203	C	A	224.58	124	#1/1	#0/1	#0/0	#0/0	#0/0
Scaffold7	2128327	A	G	173.12	20	#1/1	#0/1	#0/0	#0/0	#0/0
Scaffold7	2447622	A	G	142.13	86	#1/1	#0/1	#0/0	#0/0	#0/0
Scaffold7	2447628	G	A	195.16	85	#1/1	#0/1	#0/0	#0/0	#0/0
Scaffold7	2447629	A	C	195.16	85	#1/1	#0/1	#0/0	#0/0	#0/0
Scaffold7	2447663	C	T	356.58	103	#1/1	#0/1	#0/0	#0/0	#0/0
Scaffold7	2447672	C	T	356.58	103	#1/1	#0/1	#0/0	#0/0	#0/0
Scaffold7	2447690	G	A	404.96	112	#1/1	#0/1	#0/0	#0/0	#0/0
Scaffold7	2447693	G	A	405.69	111	#1/1	#0/1	#0/0	#0/0	#0/0
Scaffold7	2447697	C	T	452.3	117	#1/1	#0/1	#0/0	#0/0	#0/0
Scaffold7	2447700	A	T	452.32	117	#1/1	#0/1	#0/0	#0/0	#0/0
Scaffold7	2447715	T	G	490.24	123	#1/1	#0/1	#0/0	#0/0	#0/0
Scaffold7	2447717	A	T	494.07	122	#1/1	#0/1	#0/0	#0/0	#0/0
Scaffold7	2447739	G	A	452.08	124	#1/1	#0/1	#0/0	#0/0	#0/0
Scaffold7	2470747	G	A	28.6	101	#1/1	#0/1	#0/0	#0/0	#0/0
Scaffold7	2470807	C	T	19.35	99	#1/1	#0/1	#0/0	#0/0	#0/0
Scaffold7	2473141	T	C	31.59	183	#1/1	#0/1	#0/0	#0/0	#0/0
Scaffold7	2473143	T	C	31.59	182	#1/1	#0/1	#0/0	#0/0	#0/0
Scaffold7	2512070	T	C	231.33	142	#1/1	#0/1	#0/0	#0/0	#0/0
Scaffold7	2570702	A	G	184.48	101	#1/1	#0/1	#0/0	#0/0	#0/0
Scaffold7	2637066	A	G	199.77	101	#1/1	#0/1	#0/0	#0/0	#0/0
Scaffold7	2638674	T	G	108.59	91	#1/1	#0/1	#0/0	#0/0	#0/0
Scaffold7	2680501	C	T	287.42	104	#1/1	#0/1	#0/0	#0/0	#0/0
Scaffold7	2680508	C	T	329.33	103	#1/1	#0/1	#0/0	#0/0	#0/0
Scaffold7	2680516	A	T	240.19	110	#1/1	#0/1	#0/0	#0/0	#0/0
Scaffold7	2680523	G	A	240.29	104	#1/1	#0/1	#0/0	#0/0	#0/0
Scaffold7	2680547	T	G	149.13	107	#1/1	#0/1	#0/0	#0/0	#0/0
Scaffold7	2680548	G	A	141.44	108	#1/1	#0/1	#0/0	#0/0	#0/0
Scaffold7	2680555	G	A	103.24	99	#1/1	#0/1	#0/0	#0/0	#0/0
Scaffold7	2684769	C	T	56.66	104	#1/1	#0/1	#0/0	#0/0	#0/0
Scaffold7	2684787	C	T	81.5	115	#1/1	#0/1	#0/0	#0/0	#0/0
Scaffold7	2684788	A	G	82.24	114	#1/1	#0/1	#0/0	#0/0	#0/0
Scaffold7	2684794	C	A	80.43	116	#1/1	#0/1	#0/0	#0/0	#0/0
Scaffold7	2684804	T	C	86.42	109	#1/1	#0/1	#0/0	#0/0	#0/0
Scaffold7	2684808	T	C	86.42	109	#1/1	#0/1	#0/0	#0/0	#0/0
Scaffold7	4396200	T	A	280.08	243	#1/1	#0/1	#0/0	#0/0	#0/0
Scaffold7	4396251	C	G	588.9	278	#1/1	#0/1	#0/0	#0/0	#0/0
Scaffold7	4396264	C	T	562.9	262	#1/1	#0/1	#0/0	#0/0	#0/0
Scaffold7	4396348	G	A	330.99	234	#1/1	#0/1	#0/0	#0/0	#0/0
Scaffold7	4396361	A	G	243.25	251	#1/1	#0/1	#0/0	#0/0	#0/0
Scaffold7	4396625	T	C	630.73	384	#1/1	#0/1	#0/0	#0/0	#0/0
Scaffold7	4811076	A	T	235.37	267	#1/1	#0/1	#0/0	#0/0	#0/0
Scaffold7	4900458	G	C	262.53	94	#1/1	#0/1	#0/0	#0/0	#0/0
Scaffold7	4939808	G	A	100.29	83	#1/1	#0/1	#0/0	#0/0	#0/0
Scaffold7	4940509	A	G	578	109	#1/1	#0/1	#0/0	#0/0	#0/0
Scaffold7	5077278	A	G	197.58	120	#1/1	#0/1	#0/0	#0/0	#0/0
Scaffold7	5077408	C	T	99.81	107	#1/1	#0/1	#0/0	#0/0	#0/0
Scaffold7	5077424	G	A	133.21	110	#1/1	#0/1	#0/0	#0/0	#0/0
Scaffold7	5077445	C	T	136.96	99	#1/1	#0/1	#0/0	#0/0	#0/0
Scaffold7	5077472	G	A	177.35	94	#1/1	#0/1	#0/0	#0/0	#0/0
Scaffold7	5161654	G	A	3195.66	87	#0/0	#0/1	#1/1	#1/1	#1/1
Scaffold7	5182163	G	A	605.05	93	#1/1	#0/1	#0/0	#0/0	#0/0
Scaffold7	5182262	C	G	709.9	102	#1/1	#0/1	#0/0	#0/0	#0/0
Scaffold7	5227182	G	T	241.19	113	#1/1	#0/1	#0/0	#0/0	#0/0
Scaffold7	5227186	G	A	417.34	115	#1/1	#0/1	#0/0	#0/0	#0/0
Scaffold7	5247066	A	C	136.15	98	#1/1	#0/1	#0/0	#0/0	#0/0
Scaffold7	5247091	C	T	164.62	106	#1/1	#0/1	#0/0	#0/0	#0/0
Scaffold7	5247111	A	G	231.5	103	#1/1	#0/1	#0/0	#0/0	#0/0
Scaffold7	5247128	G	A	233.82	99	#1/1	#0/1	#0/0	#0/0	#0/0
Scaffold7	5371280	A	G	239.11	89	#1/1	#0/1	#0/0	#0/0	#0/0
Scaffold7	5409097	C	T	323.5	87	#1/1	#0/1	#0/0	#0/0	#0/0
Scaffold7	5409111	G	A	371.36	81	#1/1	#0/1	#0/0	#0/0	#0/0
Scaffold7	5409123	G	A	371.36	75	#1/1	#0/1	#0/0	#0/0	#0/0
Scaffold7	5409133	T	C	282.06	67	#1/1	#0/1	#0/0	#0/0	#0/0
Scaffold7	5409151	C	T	284.86	57	#1/1	#0/1	#0/0	#0/0	#0/0
Scaffold7	5409170	A	G	195.94	53	#1/1	#0/1	#0/0	#0/0	#0/0
Scaffold7	5409171	C	T	192.29	53	#1/1	#0/1	#0/0	#0/0	#0/0
Scaffold8	1000796	G	A	286.7	71	#1/1	#0/1	#0/0	#0/0	#0/0
Scaffold8	1010339	A	G	40.56	67	#1/1	#0/1	#0/0	#0/0	#0/0
Scaffold8	1010357	T	C	31.92	69	#1/1	#0/1	#0/0	#0/0	#0/0
Scaffold8	1010369	G	A	29.03	76	#1/1	#0/1	#0/0	#0/0	#0/0
Scaffold8	1017954	G	A	46.26	91	#1/1	#0/1	#0/0	#0/0	#0/0
Scaffold8	1057862	C	T	244.72	83	#1/1	#0/1	#0/0	#0/0	#0/0
Scaffold8	1057870	C	T	226.31	84	#1/1	#0/1	#0/0	#0/0	#0/0
Scaffold8	1057884	G	A	218.73	85	#1/1	#0/1	#0/0	#0/0	#0/0
Scaffold8	1057890	C	T	174.56	87	#1/1	#0/1	#0/0	#0/0	#0/0
Scaffold8	1116927	C	T	232.84	159	#1/1	#0/1	#0/0	#0/0	#0/0
Scaffold8	1117063	T	C	222.06	88	#1/1	#0/1	#0/0	#0/0	#0/0
Scaffold8	1117064	C	T	222	88	#1/1	#0/1	#0/0	#0/0	#0/0
Scaffold8	1118536	G	A	391.25	163	#1/1	#0/1	#0/0	#0/0	#0/0
Scaffold8	1275745	A	G	371.68	84	#1/1	#0/1	#0/0	#0/0	#0/0
Scaffold8	1276501	A	G	130.13	38	#1/1	#0/1	#0/0	#0/0	#0/0
Scaffold8	1276524	C	T	80.44	36	#1/1	#0/1	#0/0	#0/0	#0/0
Scaffold8	1454037	A	G	371.37	90	#1/1	#0/1	#0/0	#0/0	#0/0
Scaffold8	1455420	C	A	88.59	105	#1/1	#0/1	#0/0	#0/0	#0/0
Scaffold9	830139	T	A	2967.9	116	#0/0	#0/1	#1/1	#1/1	#1/1
Scaffold9	830167	A	G	2832.9	115	#0/0	#0/1	#1/1	#1/1	#1/1
Scaffold9	830205	A	G	2387.9	102	#0/0	#0/1	#1/1	#1/1	#1/1
Scaffold9	830383	A	C	3346.9	127	#0/0	#0/1	#1/1	#1/1	#1/1
Scaffold9	830512	A	T	3868.9	139	#0/0	#0/1	#1/1	#1/1	#1/1
Scaffold9	887141	G	T	191.34	74	#1/1	#0/1	#0/0	#0/0	#0/0
Scaffold9	892631	G	C	301.19	97	#1/1	#0/1	#0/0	#0/0	#0/0
Scaffold9	892641	A	G	303.65	96	#1/1	#0/1	#0/0	#0/0	#0/0
Scaffold9	892643	G	C	304.08	94	#1/1	#0/1	#0/0	#0/0	#0/0
1 REF, Reference allele; ALT, Alternate allele; QUAL, Quality; DP, Filtered depth; GT, Genotype
